# Supplementary material for: Curvature effects on the bifunctional oxygen catalytic performance of single atom metal–N–C
Source: Royal Society of Chemistry journal article supplement (doi:10.1039/d2nr05974f), 2022-12-20
Supplement: d2nr05974f1.pdf [file d2nr05974f1.pdf]

Supplementary Information for

## **Curvature Effects on the Bifunctional Oxygen Catalytic Performance of Single Atom Metal-N-C**

*Xuyan Zhou,<sup>a,c</sup> Zeyu Jin,<sup>a,c</sup> Jingzi Zhang,<sup>a,c</sup> Kailong Hu,<sup>a,c</sup> Sida Liu,<sup>b\*</sup> Hua-Jun Qiu,<sup>a,c\*</sup>  
and Xi Lin<sup>a,c,d\*</sup>*

<sup>a</sup> School of Materials Science and Engineering, Harbin Institute of Technology, Shenzhen 518055, China

<sup>b</sup> Institute for Advanced Technology, Shandong University, Jinan 250061, China

<sup>c</sup> Blockchain Development and Research Institute, Harbin Institute of Technology, Shenzhen 518055, China

<sup>d</sup> State Key Laboratory of Advanced Welding and Joining, Harbin Institute of Technology, Harbin 150001, China

## Supplementary computational details

The ORR and OER pathways were calculated in detail according to electrochemical framework developed by Nørskov and his co-workers<sup>1</sup>. As for ORR, in an alkaline electrolyte, H<sub>2</sub>O rather than H<sub>3</sub>O<sup>+</sup> may act as the proton donor, so overall reaction scheme of the ORR can be written as:

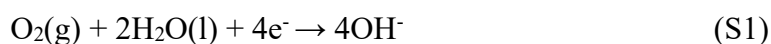

Usually, the ORR reaction is the four-electron reaction pathway:

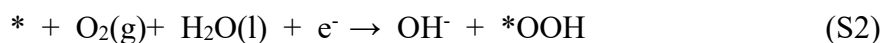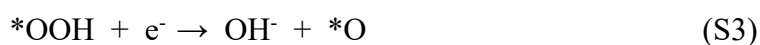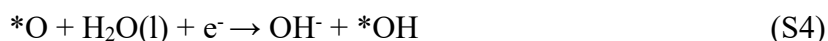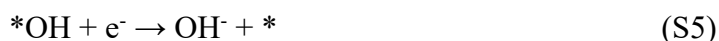

where \* represents the catalyst surface and \*OOH, \*O and \*OH species are oxygenated intermediates.

As the reverse process of ORR, OER is also consists of four elementary steps:

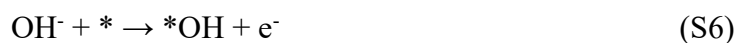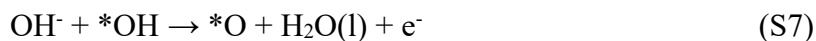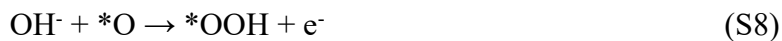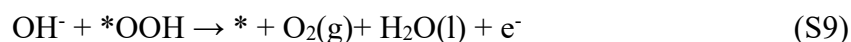

The reaction free energy of each step can be calculated by

$$\Delta\text{G} = \Delta\text{E}_{\text{DFT}} + \Delta\text{ZPE} - \text{T}\Delta\text{S} - \text{eU} \quad (\text{S10})$$

where  $\Delta\text{E}_{\text{DFT}}$ ,  $\Delta\text{ZPE}$  and  $\Delta\text{S}$  are the energy changes in the DFT total energy, zero-point energy and entropy from the initial state to the final state, respectively. As shown in Table S9, ZPE is obtained from vibrational frequency calculation. As for H<sub>2</sub>O and H<sub>2</sub> molecules, their entropy values are taken from the NIST-JANAF thermodynamics table<sup>2</sup>, while the entropies of adsorbate and adsorption sites are negligible<sup>3</sup>. Besides, the differences between the calculated free energies in vacuum and aqueous solution (VASPsol) are shown in Table S10 and regular DFT is employed in this work.

The theoretical overpotential  $\eta$  is determined by the potential limiting step:

$$\eta^{\text{ORR}} = \Delta\text{G}_{\text{max}}/\text{e} + 1.23 \quad (\text{S11})$$

$$\eta^{\text{OER}} = \Delta G_{\text{max}}/e - 1.23 \quad (\text{S12})$$

In order to establish trends in reactivity, the overpotential is often related to binding energy differences. The binding energy of the intermediate species to the surface are defined as:

$$\Delta G_{\text{*O}} = E_{\text{*O}} - E_{\text{*}} - E_{\text{H}_2\text{O}} + E_{\text{H}_2} + \Delta \text{ZPE} - T\Delta S \quad (\text{S13})$$

$$\Delta G_{\text{*OH}} = E_{\text{*OH}} - E_{\text{*}} - E_{\text{H}_2\text{O}} + (1/2)E_{\text{H}_2} + \Delta \text{ZPE} - T\Delta S \quad (\text{S14})$$

$$\Delta G_{\text{*OOH}} = E_{\text{*OOH}} - E_{\text{*}} - 2E_{\text{H}_2\text{O}} + (3/2)E_{\text{H}_2} + \Delta \text{ZPE} - T\Delta S \quad (\text{S15})$$

where  $E_{\text{*}}$ ,  $E_{\text{*O}}$ ,  $E_{\text{*OH}}$  and  $E_{\text{*OOH}}$  are the DFT total energies of a clean catalyst surface and that absorbed by a O, OH and OOH species, respectively;  $E_{\text{H}_2\text{O}}$  and  $E_{\text{H}_2}$  are the energies of a H<sub>2</sub>O and H<sub>2</sub> molecule in a vacuum, respectively.

Then, the reaction free energy of equations (S2-S5) ( $\Delta G_1$ ,  $\Delta G_2$ ,  $\Delta G_3$ ,  $\Delta G_4$ , ) for ORR can be calculated by the following equations:

$$\Delta G_1 = \Delta G_{\text{*OOH}} - 4.92 \quad (\text{S16})$$

$$\Delta G_2 = \Delta G_{\text{*O}} - \Delta G_{\text{*OOH}} \quad (\text{S17})$$

$$\Delta G_3 = \Delta G_{\text{*OH}} - \Delta G_{\text{*O}} \quad (\text{S18})$$

$$\Delta G_4 = - \Delta G_{\text{*OH}} \quad (\text{S19})$$

The reaction free energy of equations (S6-S9) ( $\Delta G_1$ ,  $\Delta G_2$ ,  $\Delta G_3$ ,  $\Delta G_4$ , ) for OER can be calculated by the following equations:

$$\Delta G_1 = \Delta G_{\text{*OH}} \quad (\text{S20})$$

$$\Delta G_2 = \Delta G_{\text{*O}} - \Delta G_{\text{*OH}} \quad (\text{S21})$$

$$\Delta G_3 = \Delta G_{\text{*OOH}} - \Delta G_{\text{*O}} \quad (\text{S22})$$

$$\Delta G_4 = 4.92 - \Delta G_{\text{*OOH}} \quad (\text{S23})$$

We check for the stability of the SAC against metal atom aggregation by comparing the difference between the adsorption energies of the metal atom on the N-doped carbon substrates ( $E_{\text{bind}}$ ) and the bulk cohesive energy ( $E_{\text{coh}}$ ).

$$E_{\text{bind}} = E_{\text{all}} - E_{\text{substrate}} - E_{\text{metal-atom}} \quad (\text{S24})$$

$$E_{\text{coh}} = 1/n * E_{\text{bulk}} - E_{\text{metal-atom}} \quad (\text{S25})$$

where n is the number of atoms in the bulk.

## Figures

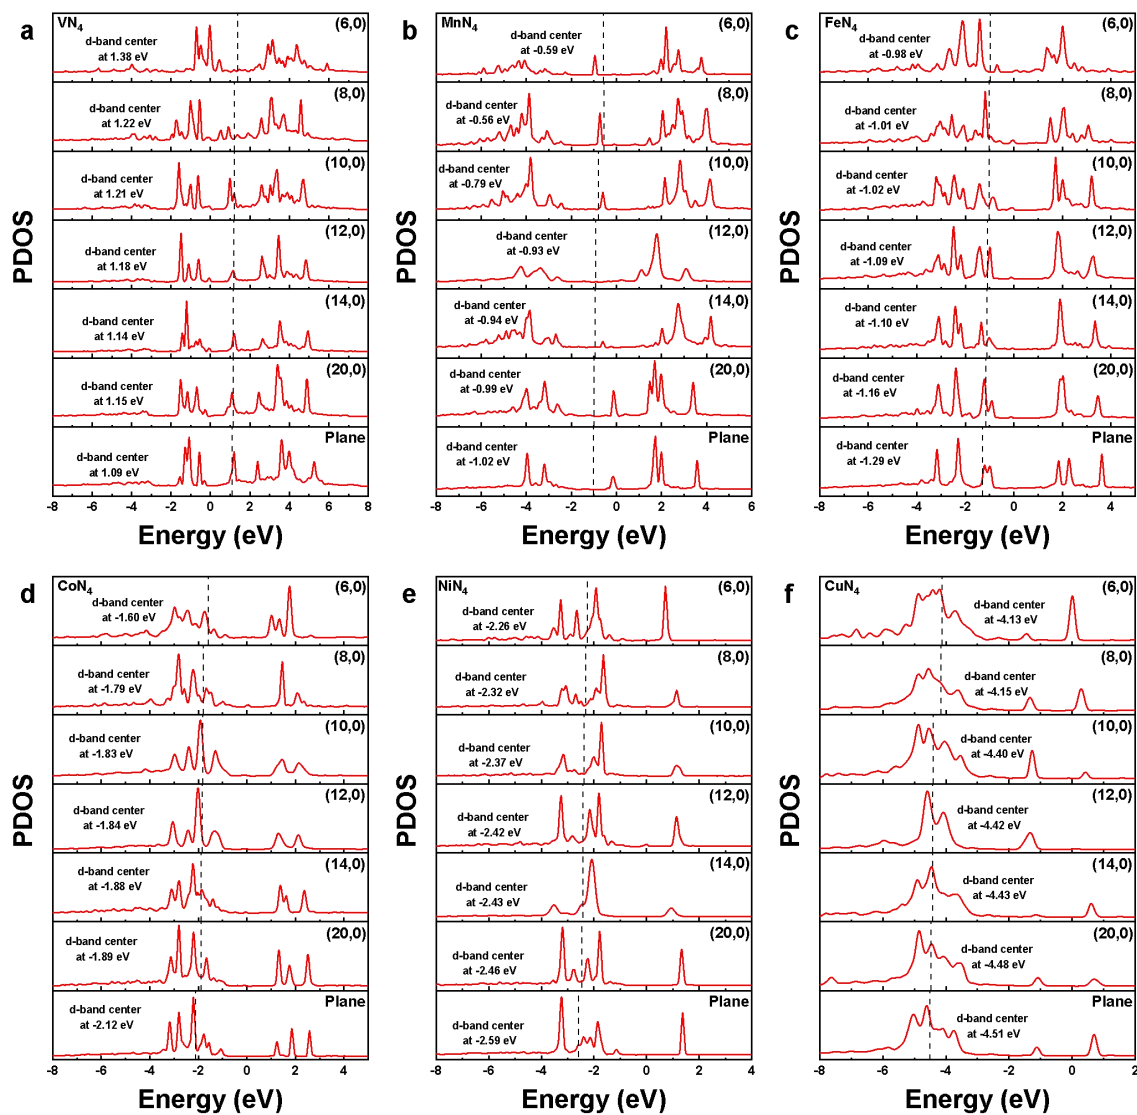

**Fig. 1S.** Projected density of states (pDOS) onto the d-orbital of metal atom: (a) VN<sub>4</sub>, (b) MnN<sub>4</sub>, (c) FeN<sub>4</sub>, (d) CoN<sub>4</sub>, (e) NiN<sub>4</sub> and (f) CuN<sub>4</sub>. The black dashed lines indicate the d-band center.

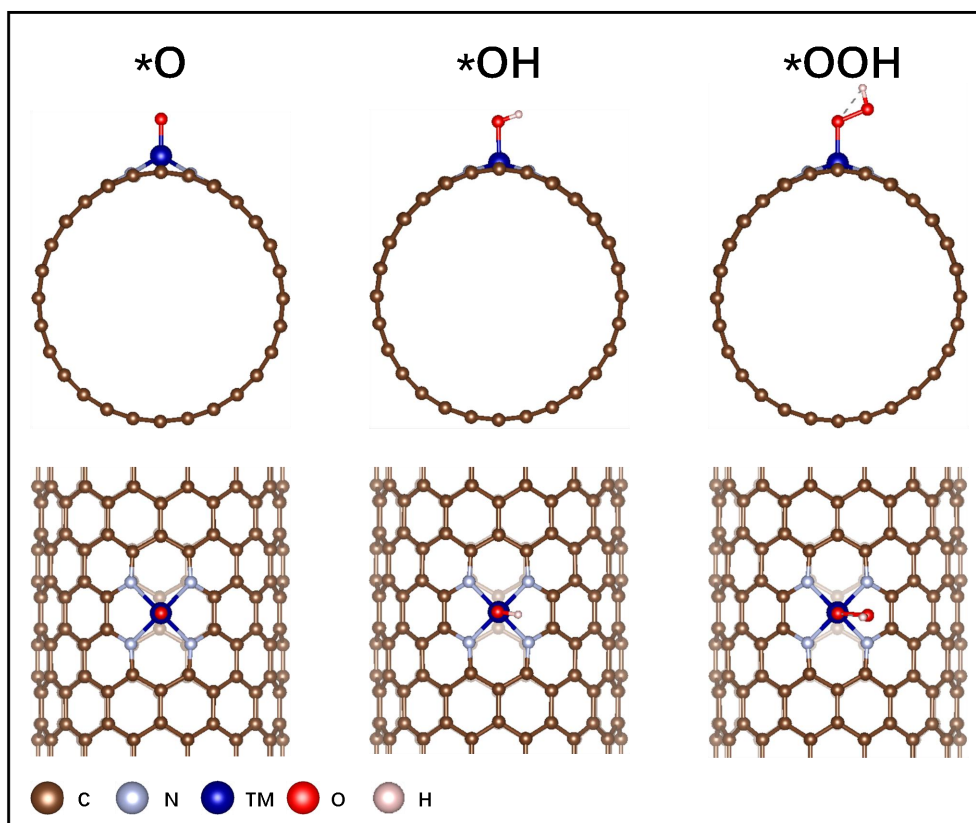

Fig. S2. The structures of reaction intermediates  $*OH$ ,  $*O$  and  $*OOH$ .

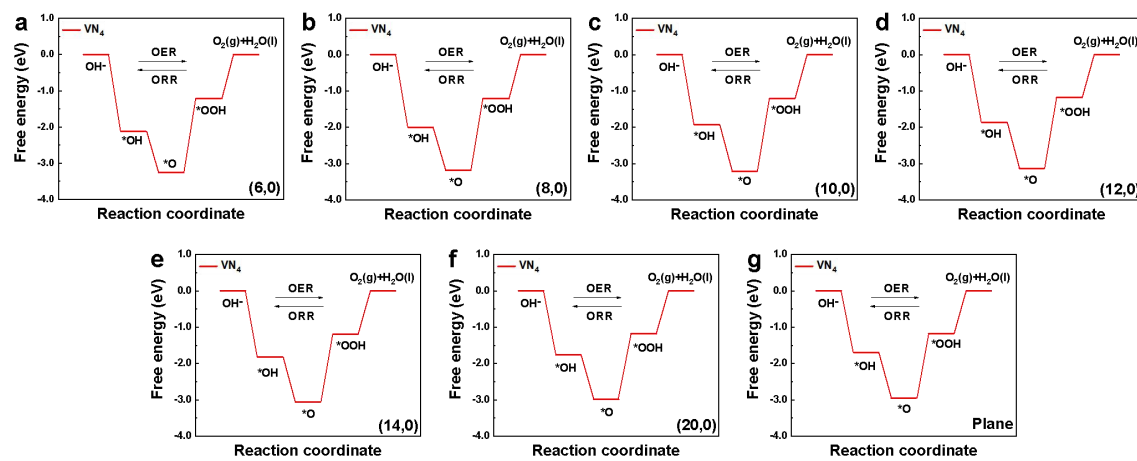

Fig. S3. Free energy diagrams of ORR and OER on  $VN_4$  with different curvatures.

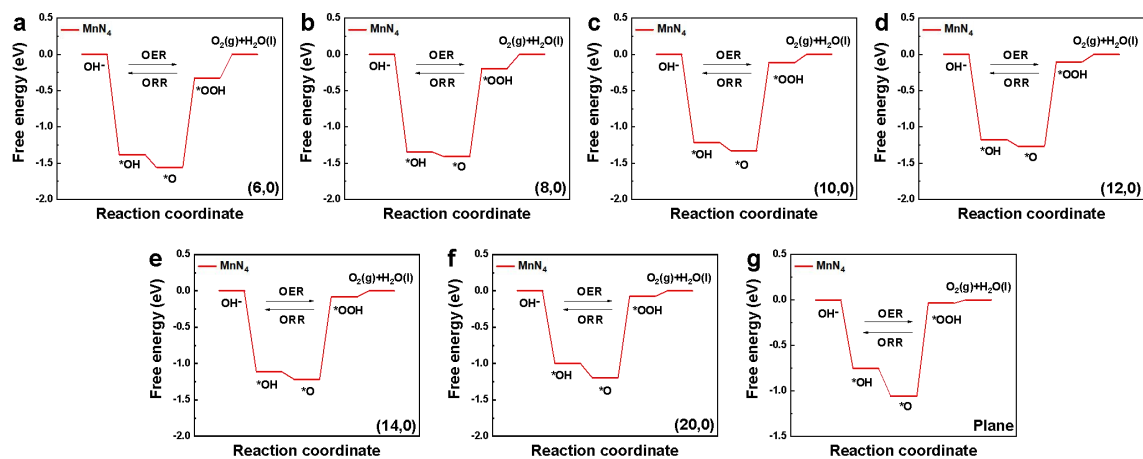

Fig. S4. Free energy diagrams of ORR and OER on  $\text{MnN}_4$  with different curvatures.

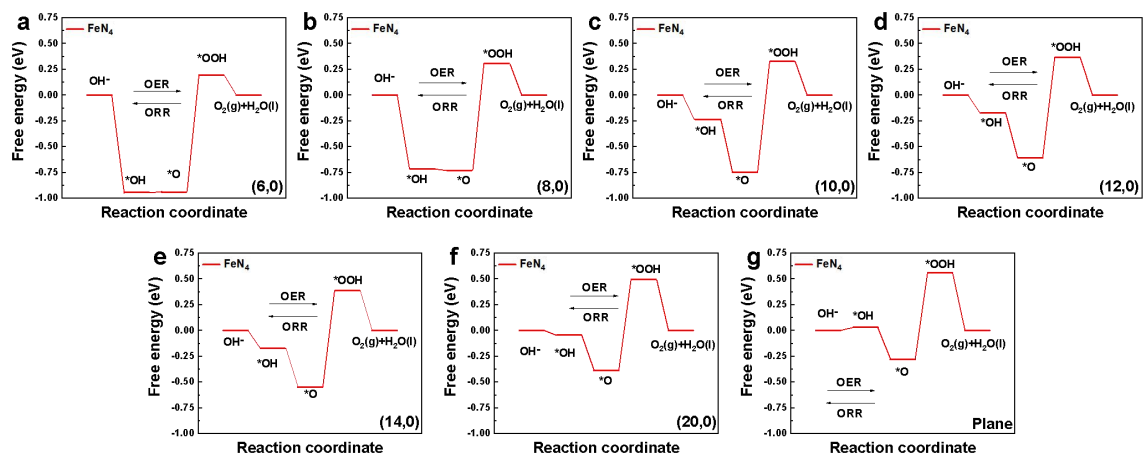

Fig. S5. Free energy diagrams of ORR and OER on  $\text{FeN}_4$  with different curvatures.

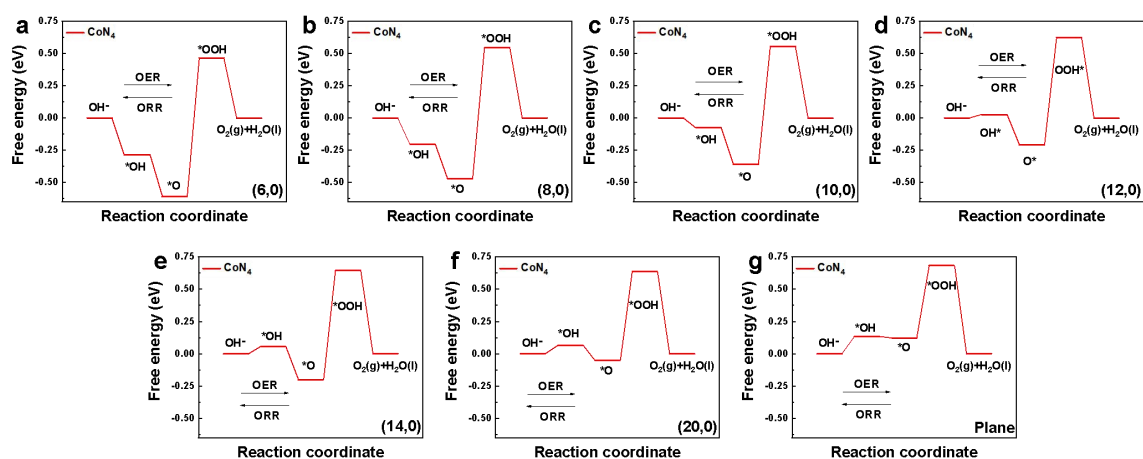

Fig. S6. Free energy diagrams of ORR and OER on  $\text{CoN}_4$  with different curvatures.

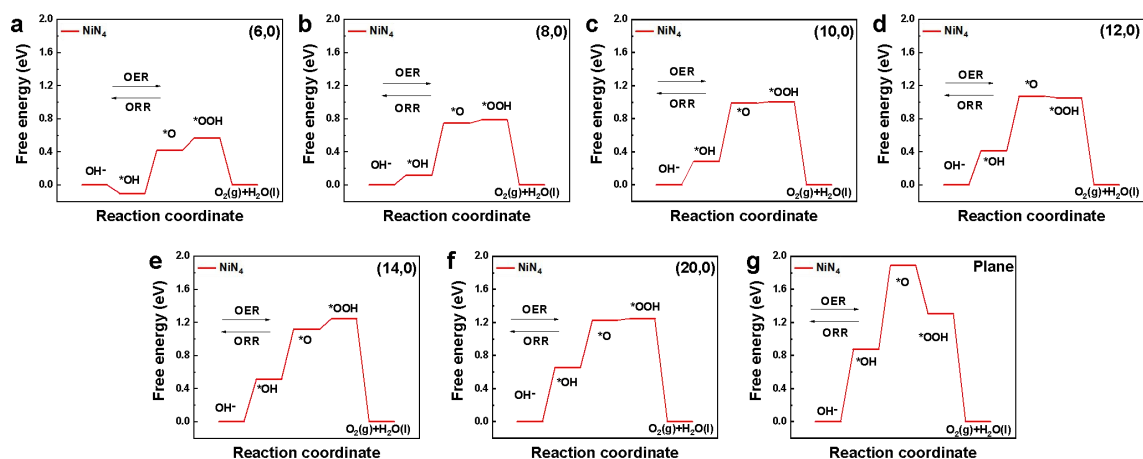

Fig. S7. Free energy diagrams of ORR and OER on NiN<sub>4</sub> with different curvatures.

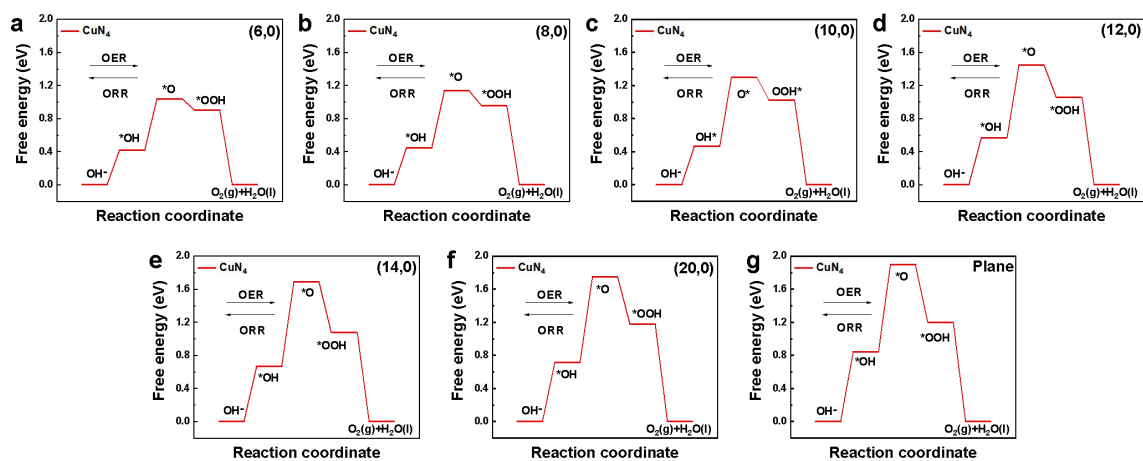

Fig. S8. Free energy diagrams of ORR and OER on CuN<sub>4</sub> with different curvatures.

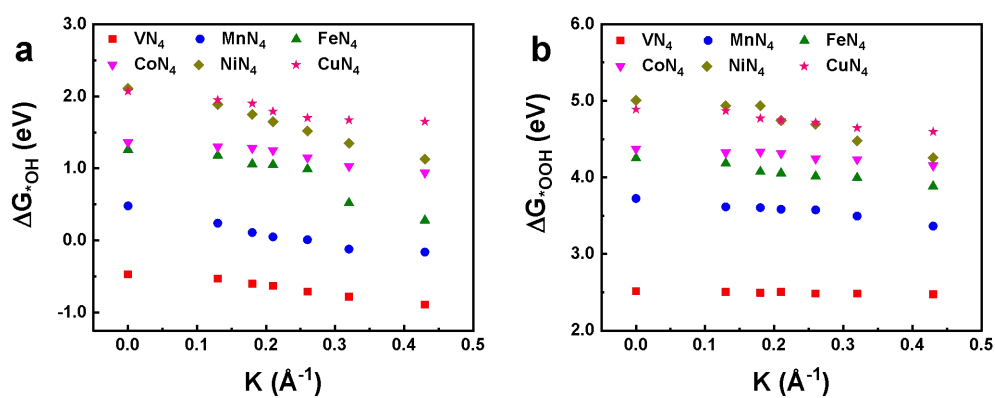

Fig. S9.  $\Delta G_{*OH}$  (a) and  $\Delta G_{*OOH}$  (b) versus  $K$ .

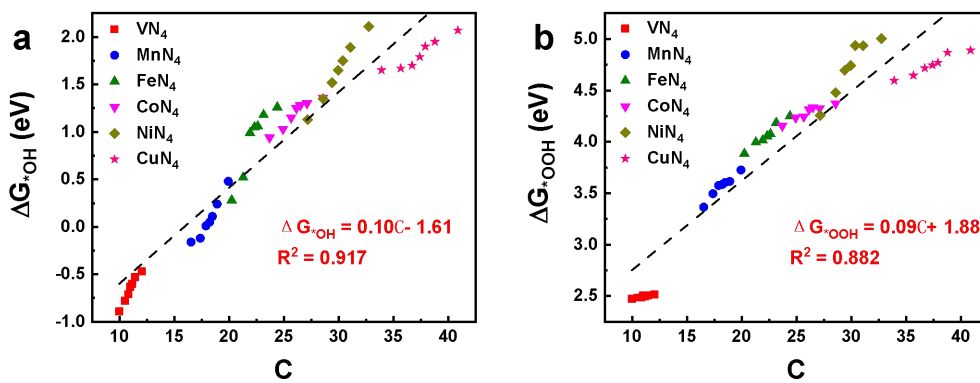

Fig. S10.  $\Delta G_{*OH}$  (a) and  $\Delta G_{*OOH}$  (b) versus the descriptor C.



## Tables

**Table S1** Values of U-J parameters for each metal element.

|     | V    | Mn   | Fe   | Co   | Ni   | Cu   |
|-----|------|------|------|------|------|------|
| U-J | 2.72 | 3.06 | 3.29 | 3.42 | 3.40 | 3.87 |

**Table S2** Diameter (D), radius (R) and curvature (K) of each model.

| Models | D (Å) | R (Å) | K (Å <sup>-1</sup> ) |
|--------|-------|-------|----------------------|
| (6,0)  | 4.70  | 2.35  | 0.43                 |
| (8,0)  | 6.26  | 3.13  | 0.32                 |
| (10,0) | 7.83  | 3.92  | 0.26                 |
| (12,0) | 9.39  | 4.70  | 0.21                 |
| (14,0) | 10.96 | 5.48  | 0.18                 |
| (20,0) | 15.66 | 7.83  | 0.13                 |
| Plane  | ∞     | ∞     | 0                    |

**Table S3** Reaction free energies of each step for ORR and overpotentials for VN<sub>4</sub>, MnN<sub>4</sub>, FeN<sub>4</sub>, CoN<sub>4</sub>, NiN<sub>4</sub>, and CuN<sub>4</sub>. The rate-limiting steps are highlighted in bold font.

| Models           | $\Delta G_1$ (eV) | $\Delta G_2$ (eV) | $\Delta G_3$ (eV) | $\Delta G_4$ (eV) | $\eta^{\text{ORR}}$ (V) |      |
|------------------|-------------------|-------------------|-------------------|-------------------|-------------------------|------|
| VN <sub>4</sub>  | (6,0)             | -2.45             | -3.27             | -0.09             | <b>0.89</b>             | 2.12 |
|                  | (8,0)             | -2.44             | -3.21             | -0.05             | <b>0.78</b>             | 2.01 |
|                  | (10,0)            | -2.44             | -3.23             | 0.04              | <b>0.71</b>             | 1.94 |
|                  | (12,0)            | -2.41             | -3.17             | 0.03              | <b>0.63</b>             | 1.86 |
|                  | (14,0)            | -2.43             | -3.09             | 0.00              | <b>0.60</b>             | 1.83 |
|                  | (20,0)            | -2.41             | -3.03             | -0.01             | <b>0.53</b>             | 1.76 |
|                  | Plane             | -2.40             | -3.02             | 0.03              | <b>0.47</b>             | 1.70 |
| MnN <sub>4</sub> | (6,0)             | -1.56             | -2.46             | -1.06             | <b>0.16</b>             | 1.39 |
|                  | (8,0)             | -1.43             | -2.45             | -1.16             | <b>0.12</b>             | 1.35 |
|                  | (10,0)            | -1.35             | -2.44             | -1.12             | <b>-0.01</b>            | 1.22 |
|                  | (12,0)            | -1.34             | -2.40             | -1.13             | <b>-0.05</b>            | 1.18 |
|                  | (14,0)            | -1.32             | -2.37             | -1.12             | <b>-0.11</b>            | 1.12 |
|                  | (20,0)            | -1.30             | -2.35             | -1.03             | <b>-0.24</b>            | 0.99 |
|                  | Plane             | -1.19             | -2.33             | -0.93             | <b>-0.47</b>            | 0.75 |
| FeN <sub>4</sub> | (6,0)             | -1.03             | -2.37             | -1.23             | <b>-0.29</b>            | 0.95 |
|                  | (8,0)             | -0.93             | -2.26             | -1.21             | <b>-0.52</b>            | 0.71 |

|                  |        |              |       |              |       |      |
|------------------|--------|--------------|-------|--------------|-------|------|
|                  | (10,0) | -0.91        | -2.31 | <b>-0.71</b> | -0.99 | 0.52 |
|                  | (12,0) | -0.87        | -2.2  | <b>-0.80</b> | -1.05 | 0.43 |
|                  | (14,0) | <b>-0.84</b> | -2.17 | -0.85        | -1.06 | 0.39 |
|                  | (20,0) | <b>-0.74</b> | -2.11 | -0.89        | -1.18 | 0.49 |
|                  | Plane  | <b>-0.67</b> | -2.07 | -0.92        | -1.26 | 0.56 |
|                  | (6,0)  | <b>-0.77</b> | -2.31 | -0.90        | -0.94 | 0.46 |
|                  | (8,0)  | <b>-0.68</b> | -2.25 | -0.96        | -1.03 | 0.55 |
|                  | (10,0) | <b>-0.67</b> | -2.15 | -0.95        | -1.15 | 0.56 |
| CoN <sub>4</sub> | (12,0) | <b>-0.61</b> | -2.06 | -1.00        | -1.25 | 0.62 |
|                  | (14,0) | <b>-0.59</b> | -2.07 | -0.98        | -1.28 | 0.64 |
|                  | (20,0) | <b>-0.59</b> | -1.91 | -1.12        | -1.30 | 0.64 |
|                  | Plane  | <b>-0.55</b> | -1.79 | -1.22        | -1.36 | 0.68 |
|                  | (6,0)  | <b>-0.66</b> | -1.38 | -1.75        | -1.13 | 0.57 |
|                  | (8,0)  | <b>-0.44</b> | -1.27 | -1.86        | -1.35 | 0.79 |
|                  | (10,0) | <b>-0.23</b> | -1.24 | -1.93        | -1.52 | 1.00 |
| NiN <sub>4</sub> | (12,0) | <b>-0.18</b> | -1.20 | -1.89        | -1.65 | 1.05 |
|                  | (14,0) | <b>0.02</b>  | -1.36 | -1.83        | -1.75 | 1.25 |
|                  | (20,0) | <b>0.01</b>  | -1.24 | -1.8         | -1.89 | 1.24 |
|                  | Plane  | <b>0.08</b>  | -0.65 | -2.24        | -2.11 | 1.31 |
|                  | (6,0)  | <b>-0.32</b> | -1.10 | -1.85        | -1.65 | 0.91 |
|                  | (8,0)  | <b>-0.27</b> | -1.05 | -1.93        | -1.67 | 0.96 |
|                  | (10,0) | <b>-0.21</b> | -0.95 | -2.06        | -1.70 | 1.03 |
| CuN <sub>4</sub> | (12,0) | <b>-0.18</b> | -0.84 | -2.11        | -1.79 | 1.05 |
|                  | (14,0) | <b>-0.14</b> | -0.62 | -2.26        | -1.90 | 1.08 |
|                  | (20,0) | <b>-0.04</b> | -0.66 | -2.27        | -1.95 | 1.18 |
|                  | Plane  | <b>-0.03</b> | -0.53 | -2.29        | -2.07 | 1.20 |

**Table S4** Reaction free energies of each step for OER and overpotentials for VN<sub>4</sub>, MnN<sub>4</sub>, FeN<sub>4</sub>, CoN<sub>4</sub>, NiN<sub>4</sub>, and CuN<sub>4</sub>. The rate-limiting steps are highlighted in bold font.

| Models           | $\Delta G_1$ (eV) | $\Delta G_2$ (eV) | $\Delta G_3$ (eV) | $\Delta G_4$ (eV) | $\eta^{\text{OER}}$ (V) |      |
|------------------|-------------------|-------------------|-------------------|-------------------|-------------------------|------|
| VN <sub>4</sub>  | (6,0)             | -0.89             | 0.09              | <b>3.27</b>       | 2.45                    | 2.04 |
|                  | (8,0)             | -0.78             | 0.05              | <b>3.21</b>       | 2.44                    | 1.98 |
|                  | (10,0)            | -0.71             | -0.04             | <b>3.23</b>       | 2.44                    | 2.00 |
|                  | (12,0)            | -0.63             | -0.03             | <b>3.17</b>       | 2.41                    | 1.94 |
|                  | (14,0)            | -0.6              | 0.00              | <b>3.09</b>       | 2.43                    | 1.86 |
|                  | (20,0)            | -0.53             | 0.01              | <b>3.03</b>       | 2.41                    | 1.80 |
|                  | Plane             | -0.47             | -0.03             | <b>3.02</b>       | 2.4                     | 1.79 |
| MnN <sub>4</sub> | (6,0)             | -0.16             | 1.06              | <b>2.46</b>       | 1.56                    | 1.23 |
|                  | (8,0)             | -0.12             | 1.16              | <b>2.45</b>       | 1.43                    | 1.22 |
|                  | (10,0)            | 0.01              | 1.12              | <b>2.44</b>       | 1.35                    | 1.21 |
|                  | (12,0)            | 0.05              | 1.13              | <b>2.4</b>        | 1.34                    | 1.17 |
|                  | (14,0)            | 0.11              | 1.12              | <b>2.37</b>       | 1.32                    | 1.14 |
|                  | (20,0)            | 0.24              | 1.03              | <b>2.35</b>       | 1.3                     | 1.12 |
|                  | Plane             | 0.47              | 0.93              | <b>2.33</b>       | 1.19                    | 1.10 |
| FeN <sub>4</sub> | (6,0)             | 0.29              | 1.23              | <b>2.37</b>       | 1.03                    | 1.14 |
|                  | (8,0)             | 0.52              | 1.21              | <b>2.26</b>       | 0.93                    | 1.03 |
|                  | (10,0)            | 0.99              | 0.71              | <b>2.31</b>       | 0.91                    | 1.08 |
|                  | (12,0)            | 1.05              | 0.80              | <b>2.20</b>       | 0.87                    | 0.97 |
|                  | (14,0)            | 1.06              | 0.85              | <b>2.17</b>       | 0.84                    | 0.94 |
|                  | (20,0)            | 1.18              | 0.89              | <b>2.11</b>       | 0.74                    | 0.88 |
|                  | Plane             | 1.26              | 0.92              | <b>2.07</b>       | 0.67                    | 0.84 |
| CoN <sub>4</sub> | (6,0)             | 0.94              | 0.90              | <b>2.31</b>       | 0.77                    | 1.08 |
|                  | (8,0)             | 1.03              | 0.96              | <b>2.25</b>       | 0.68                    | 1.02 |
|                  | (10,0)            | 1.15              | 0.95              | <b>2.15</b>       | 0.67                    | 0.92 |
|                  | (12,0)            | 1.25              | 1.00              | <b>2.06</b>       | 0.61                    | 0.83 |
|                  | (14,0)            | 1.28              | 0.98              | <b>2.07</b>       | 0.59                    | 0.84 |
|                  | (20,0)            | 1.3               | 1.12              | <b>1.91</b>       | 0.59                    | 0.68 |
|                  | Plane             | 1.36              | 1.22              | <b>1.79</b>       | 0.55                    | 0.56 |
| NiN <sub>4</sub> | (6,0)             | 1.13              | <b>1.75</b>       | 1.38              | 0.66                    | 0.52 |
|                  | (8,0)             | 1.35              | <b>1.86</b>       | 1.27              | 0.44                    | 0.63 |
|                  | (10,0)            | 1.52              | <b>1.93</b>       | 1.24              | 0.23                    | 0.70 |

|                  |        |             |             |      |       |      |
|------------------|--------|-------------|-------------|------|-------|------|
|                  | (12,0) | 1.65        | <b>1.89</b> | 1.20 | 0.18  | 0.66 |
|                  | (14,0) | 1.75        | <b>1.83</b> | 1.36 | -0.02 | 0.60 |
|                  | (20,0) | <b>1.89</b> | 1.80        | 1.24 | -0.01 | 0.66 |
|                  | Plane  | 2.11        | <b>2.24</b> | 0.65 | -0.08 | 1.01 |
| CuN <sub>4</sub> | (6,0)  | 1.65        | <b>1.85</b> | 1.10 | 0.32  | 0.62 |
|                  | (8,0)  | 1.67        | <b>1.93</b> | 1.05 | 0.27  | 0.70 |
|                  | (10,0) | 1.70        | <b>2.06</b> | 0.95 | 0.21  | 0.83 |
|                  | (12,0) | 1.79        | <b>2.11</b> | 0.84 | 0.18  | 0.88 |
|                  | (14,0) | 1.90        | <b>2.26</b> | 0.62 | 0.14  | 1.03 |
|                  | (20,0) | 1.95        | <b>2.27</b> | 0.66 | 0.04  | 1.04 |
|                  | Plane  | 2.07        | <b>2.29</b> | 0.53 | 0.03  | 1.06 |

**Table S5** Adsorption free energies of \*O, \*OH and \*OOH for each model.

|                  | Models | $\Delta G^{*O}$ (eV) | $\Delta G^{*OH}$ (eV) | $\Delta G^{*OOH}$ (eV) |
|------------------|--------|----------------------|-----------------------|------------------------|
| VN <sub>4</sub>  | (6,0)  | -0.80                | -0.89                 | 2.47                   |
|                  | (8,0)  | -0.73                | -0.78                 | 2.48                   |
|                  | (10,0) | -0.75                | -0.71                 | 2.48                   |
|                  | (12,0) | -0.67                | -0.63                 | 2.51                   |
|                  | (14,0) | -0.60                | -0.60                 | 2.49                   |
|                  | (20,0) | -0.53                | -0.53                 | 2.50                   |
|                  | Plane  | -0.49                | -0.47                 | 2.52                   |
| MnN <sub>4</sub> | (6,0)  | 0.90                 | -0.16                 | 3.36                   |
|                  | (8,0)  | 1.05                 | -0.12                 | 3.49                   |
|                  | (10,0) | 1.13                 | 0.01                  | 3.57                   |
|                  | (12,0) | 1.19                 | 0.05                  | 3.58                   |
|                  | (14,0) | 1.24                 | 0.11                  | 3.60                   |
|                  | (20,0) | 1.26                 | 0.24                  | 3.61                   |
|                  | Plane  | 1.40                 | 0.48                  | 3.73                   |
| FeN <sub>4</sub> | (6,0)  | 1.52                 | 0.28                  | 3.89                   |
|                  | (8,0)  | 1.73                 | 0.52                  | 3.99                   |
|                  | (10,0) | 1.71                 | 0.99                  | 4.01                   |
|                  | (12,0) | 1.85                 | 1.05                  | 4.05                   |

|                  |        |      |      |      |
|------------------|--------|------|------|------|
|                  | (14,0) | 1.91 | 1.06 | 4.08 |
|                  | (20,0) | 2.07 | 1.18 | 4.18 |
|                  | Plane  | 2.18 | 1.26 | 4.25 |
| CoN <sub>4</sub> | (6,0)  | 1.84 | 0.94 | 4.15 |
|                  | (8,0)  | 1.99 | 1.03 | 4.24 |
|                  | (10,0) | 2.10 | 1.15 | 4.25 |
|                  | (12,0) | 2.25 | 1.25 | 4.31 |
|                  | (14,0) | 2.26 | 1.28 | 4.33 |
|                  | (20,0) | 2.41 | 1.30 | 4.33 |
|                  | Plane  | 2.58 | 1.36 | 4.37 |
| NiN <sub>4</sub> | (6,0)  | 2.88 | 1.13 | 4.26 |
|                  | (8,0)  | 3.21 | 1.35 | 4.48 |
|                  | (10,0) | 3.45 | 1.52 | 4.69 |
|                  | (12,0) | 3.53 | 1.65 | 4.74 |
|                  | (14,0) | 3.58 | 1.75 | 4.94 |
|                  | (20,0) | 3.69 | 1.89 | 4.93 |
|                  | Plane  | 4.35 | 2.11 | 5.00 |
| CuN <sub>4</sub> | (6,0)  | 3.50 | 1.65 | 4.60 |
|                  | (8,0)  | 3.60 | 1.67 | 4.65 |
|                  | (10,0) | 3.76 | 1.70 | 4.72 |
|                  | (12,0) | 3.91 | 1.79 | 4.74 |
|                  | (14,0) | 4.15 | 1.90 | 4.77 |
|                  | (20,0) | 4.21 | 1.95 | 4.87 |
|                  | Plane  | 4.36 | 2.07 | 4.89 |

**Table S6** The valence electrons in the d-orbital ( $N_d$ ) and electronegativity ( $\chi$ ) for each element.

| Elements | $N_d$ | $\chi_M$ |
|----------|-------|----------|
| N        | -     | 3.04     |
| O        | -     | 3.44     |
| Sc       | 1     | 1.36     |
| Ti       | 2     | 1.54     |
| V        | 3     | 1.63     |
| Cr       | 5     | 1.66     |
| Mn       | 5     | 1.55     |
| Fe       | 6     | 1.83     |
| Co       | 7     | 1.88     |
| Ni       | 8     | 1.92     |
| Cu       | 10    | 1.90     |
| Zn       | 10    | 1.65     |
| Y        | 1     | 1.22     |
| Zr       | 2     | 1.33     |
| Nb       | 4     | 1.59     |
| Mo       | 5     | 2.16     |
| Tc       | 5     | 1.91     |
| Ru       | 7     | 2.20     |
| Rh       | 8     | 2.28     |
| Pd       | 10    | 2.20     |
| Ag       | 10    | 1.93     |
| Cd       | 10    | 1.69     |
| Hf       | 2     | 1.32     |
| Ta       | 3     | 1.51     |
| W        | 4     | 2.36     |
| Re       | 5     | 1.93     |
| Os       | 6     | 2.18     |
| Ir       | 7     | 2.20     |
| Pt       | 9     | 2.28     |
| Au       | 10    | 2.54     |

**Table S7** The corresponding descriptor (C) for VN<sub>4</sub>, MnN<sub>4</sub>, FeN<sub>4</sub>, CoN<sub>4</sub>, NiN<sub>4</sub>, and CuN<sub>4</sub>.

| Models           | C     |       |        |        |        |        | Plane |
|------------------|-------|-------|--------|--------|--------|--------|-------|
|                  | (6,0) | (8,0) | (10,0) | (12,0) | (14,0) | (20,0) |       |
| VN <sub>4</sub>  | 9.98  | 10.49 | 10.80  | 11.00  | 11.15  | 11.41  | 12.03 |
| MnN <sub>4</sub> | 16.53 | 17.38 | 17.89  | 18.23  | 18.48  | 18.91  | 19.93 |
| FeN <sub>4</sub> | 20.24 | 21.29 | 21.91  | 22.32  | 22.62  | 23.15  | 24.40 |
| CoN <sub>4</sub> | 23.70 | 24.92 | 25.66  | 26.14  | 26.49  | 27.11  | 28.57 |
| NiN <sub>4</sub> | 27.16 | 28.57 | 29.40  | 29.95  | 30.36  | 31.07  | 32.74 |
| CuN <sub>4</sub> | 33.91 | 35.66 | 36.70  | 37.39  | 37.90  | 38.78  | 40.87 |

**Table S8** The corresponding descriptor (C) for other models.

| Models           | C     |       |        |        |        |        | Plane |
|------------------|-------|-------|--------|--------|--------|--------|-------|
|                  | (6,0) | (8,0) | (10,0) | (12,0) | (14,0) | (20,0) |       |
| ScN <sub>4</sub> | 3.26  | 3.43  | 3.53   | 3.60   | 3.64   | 3.73   | 3.93  |
| TiN <sub>4</sub> | 6.61  | 6.95  | 7.15   | 7.29   | 7.39   | 7.56   | 7.97  |
| CrN <sub>4</sub> | 16.66 | 17.52 | 18.04  | 18.38  | 18.62  | 19.06  | 20.09 |
| ZnN <sub>4</sub> | 33.30 | 35.02 | 36.05  | 36.72  | 37.22  | 38.09  | 40.15 |
| YN <sub>4</sub>  | 3.23  | 3.39  | 3.49   | 3.56   | 3.61   | 3.69   | 3.89  |
| ZrN <sub>4</sub> | 6.51  | 6.84  | 7.04   | 7.17   | 7.27   | 7.44   | 7.84  |
| NbN <sub>4</sub> | 13.26 | 13.95 | 14.36  | 14.63  | 14.82  | 15.17  | 15.99 |
| MoN <sub>4</sub> | 17.27 | 18.16 | 18.69  | 19.04  | 19.30  | 19.75  | 20.81 |
| TcN <sub>4</sub> | 16.97 | 17.84 | 18.36  | 18.71  | 18.96  | 19.40  | 20.45 |
| RuN <sub>4</sub> | 24.24 | 25.49 | 26.24  | 26.73  | 27.09  | 27.72  | 29.22 |
| RhN <sub>4</sub> | 27.86 | 29.30 | 30.16  | 30.72  | 31.14  | 31.86  | 33.58 |
| PdN <sub>4</sub> | 34.63 | 36.42 | 37.49  | 38.19  | 38.71  | 39.61  | 41.74 |
| AgN <sub>4</sub> | 33.98 | 35.73 | 36.78  | 37.47  | 37.98  | 38.86  | 40.96 |
| CdN <sub>4</sub> | 33.40 | 35.12 | 36.15  | 36.83  | 37.33  | 38.20  | 40.26 |
| HfN <sub>4</sub> | 6.50  | 6.84  | 7.04   | 7.17   | 7.27   | 7.44   | 7.84  |
| TaN <sub>4</sub> | 9.89  | 10.40 | 10.71  | 10.91  | 11.05  | 11.31  | 11.92 |
| WN <sub>4</sub>  | 14.01 | 14.73 | 15.16  | 15.45  | 15.65  | 16.02  | 16.88 |
| ReN <sub>4</sub> | 16.99 | 17.87 | 18.39  | 18.73  | 18.99  | 19.43  | 20.48 |
| OsN <sub>4</sub> | 20.75 | 21.82 | 22.46  | 22.88  | 23.19  | 23.73  | 25.01 |
| IrN <sub>4</sub> | 24.24 | 25.49 | 26.24  | 26.73  | 27.09  | 27.72  | 29.22 |
| PtN <sub>4</sub> | 31.34 | 32.96 | 33.93  | 34.56  | 35.03  | 35.84  | 37.78 |
| AuN <sub>4</sub> | 35.45 | 37.28 | 38.37  | 39.09  | 39.62  | 40.54  | 42.73 |

**Table S9** Zero-point energy (ZPE) and entropy correction (TS) at T = 298 K for relevant species.

| Species          | ZPE (eV) | TS (eV) |
|------------------|----------|---------|
| H <sub>2</sub> O | 0.56     | 0.67    |
| H <sub>2</sub>   | 0.27     | 0.41    |
| *OOH             | 0.35     | 0       |
| *OH              | 0.30     | 0       |
| *O               | 0.05     | 0       |

**Table S10** Adsorption free energies of \*O, \*OH and \*OOH in vacuum and aqueous solution.

| Models                  | VASP                            |                                  |                                   | VASPsol                         |                                  |                                   |
|-------------------------|---------------------------------|----------------------------------|-----------------------------------|---------------------------------|----------------------------------|-----------------------------------|
|                         | $\Delta G^*_{\text{O}}$<br>(eV) | $\Delta G^*_{\text{OH}}$<br>(eV) | $\Delta G^*_{\text{OOH}}$<br>(eV) | $\Delta G^*_{\text{O}}$<br>(eV) | $\Delta G^*_{\text{OH}}$<br>(eV) | $\Delta G^*_{\text{OOH}}$<br>(eV) |
| (6,0)                   | 1.84                            | 0.94                             | 4.15                              | 1.84                            | 0.91                             | 4.10                              |
| (8,0)                   | 1.99                            | 1.03                             | 4.24                              | 1.98                            | 1.03                             | 4.20                              |
| (10,0)                  | 2.10                            | 1.15                             | 4.25                              | 2.07                            | 1.15                             | 4.24                              |
| CoN <sub>4</sub> (12,0) | 2.25                            | 1.25                             | 4.31                              | 2.22                            | 1.25                             | 4.31                              |
| (14,0)                  | 2.26                            | 1.28                             | 4.33                              | 2.22                            | 1.27                             | 4.32                              |
| (20,0)                  | 2.41                            | 1.30                             | 4.33                              | 2.41                            | 1.30                             | 4.33                              |
| Plane                   | 2.58                            | 1.36                             | 4.37                              | 2.58                            | 1.35                             | 4.35                              |

## References

- 1 J. Nørskov, J. Rossmeisl, A. Logadottir, L. Lindqvist, *J. Phys. Chem. B*, 2004, **108**, 17886 – 17892.
- 2 M. Chase Jr, NIST JANAF Thermochemical Tables; American Institute of Physics: New York, 1998.
- 3 H. Xu, D. Cheng, D. Cao, X. C. Zeng, *Nat. Catal.*, 2018, **1**, 339-348.
